# Supplementary material for: Molecular phylogenetics and character evolution of morphologically diverse groups, Dendrobium section Dendrobium and allies
Source: PubMed Central journal article supplement (PMC4172198; doi:10.1093/aobpla/plu045), 2014-08-07

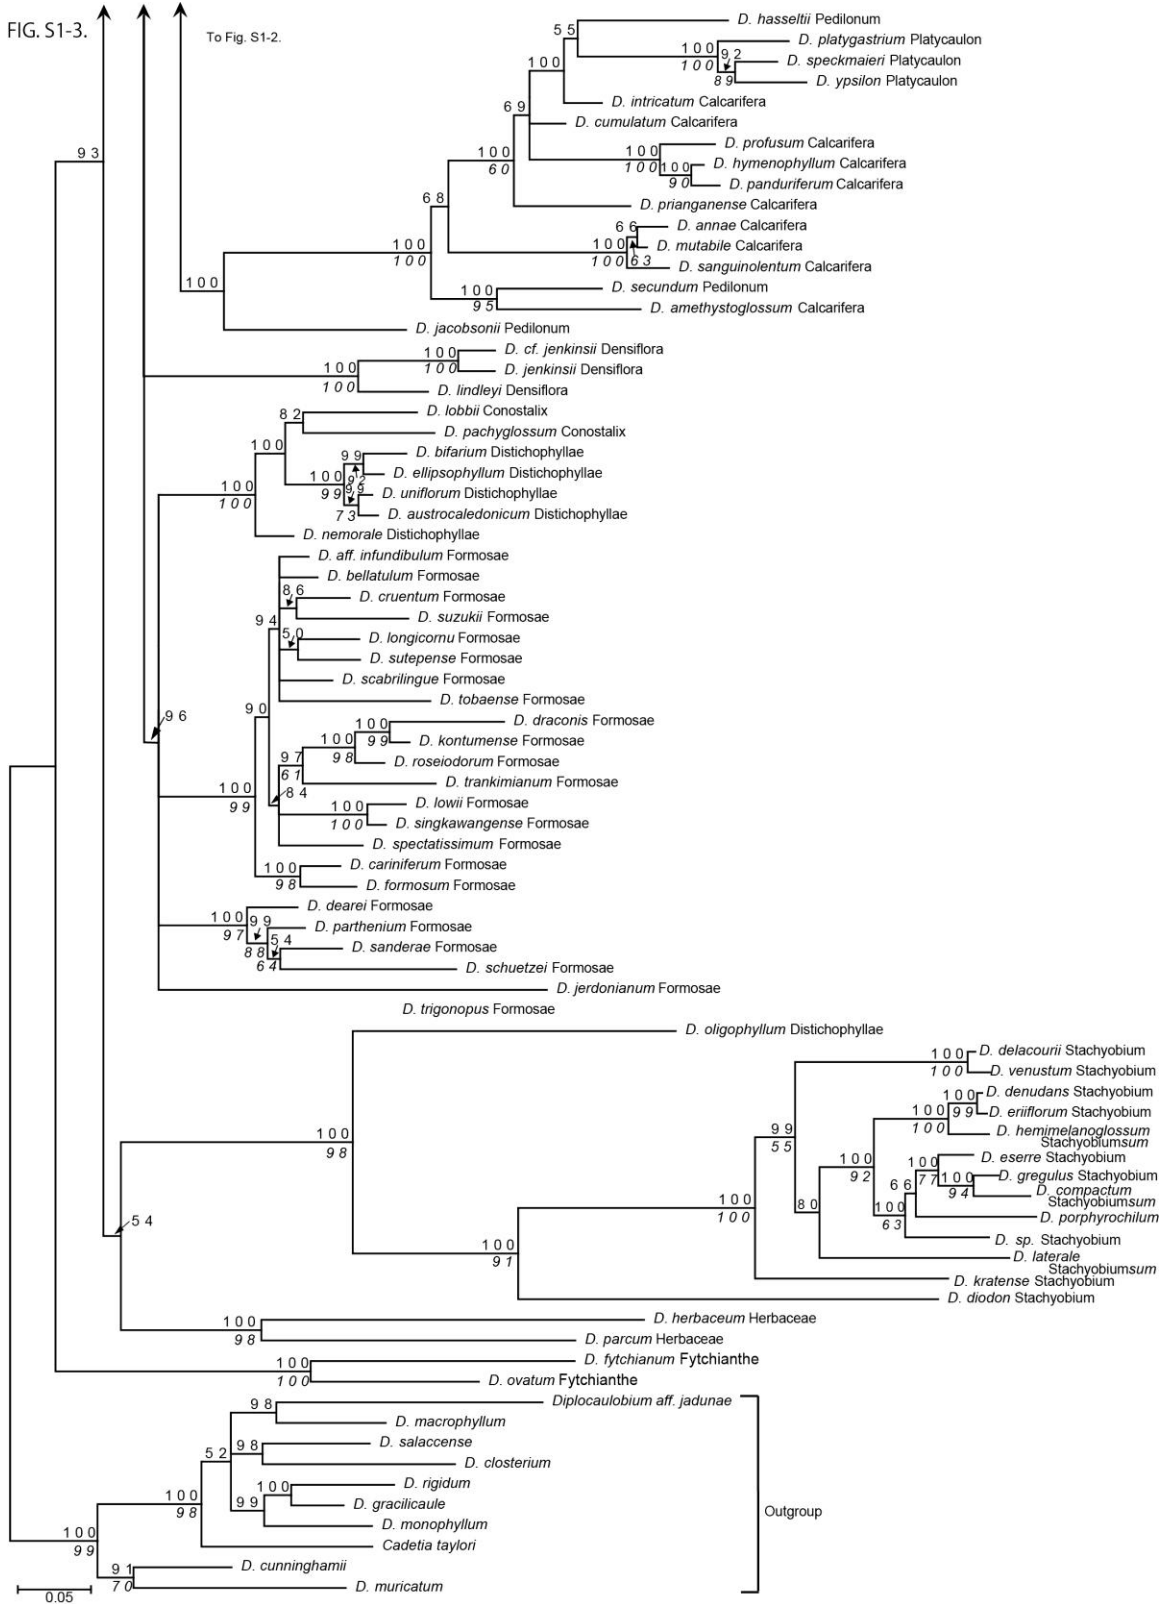

## SUPPLEMENTARY DATA

FIG. S2-1. Consensus phylogram obtained from 119935 bayesian trees with higher posterior probability from *matK* sequence

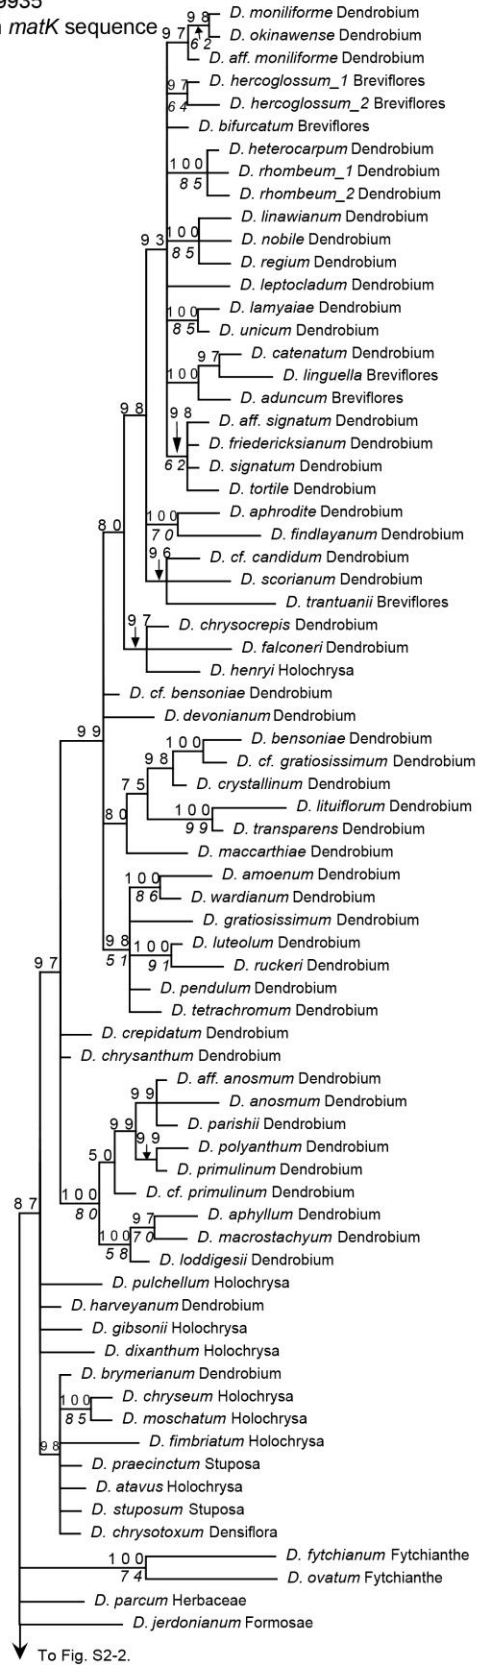

FIG. S2-2.

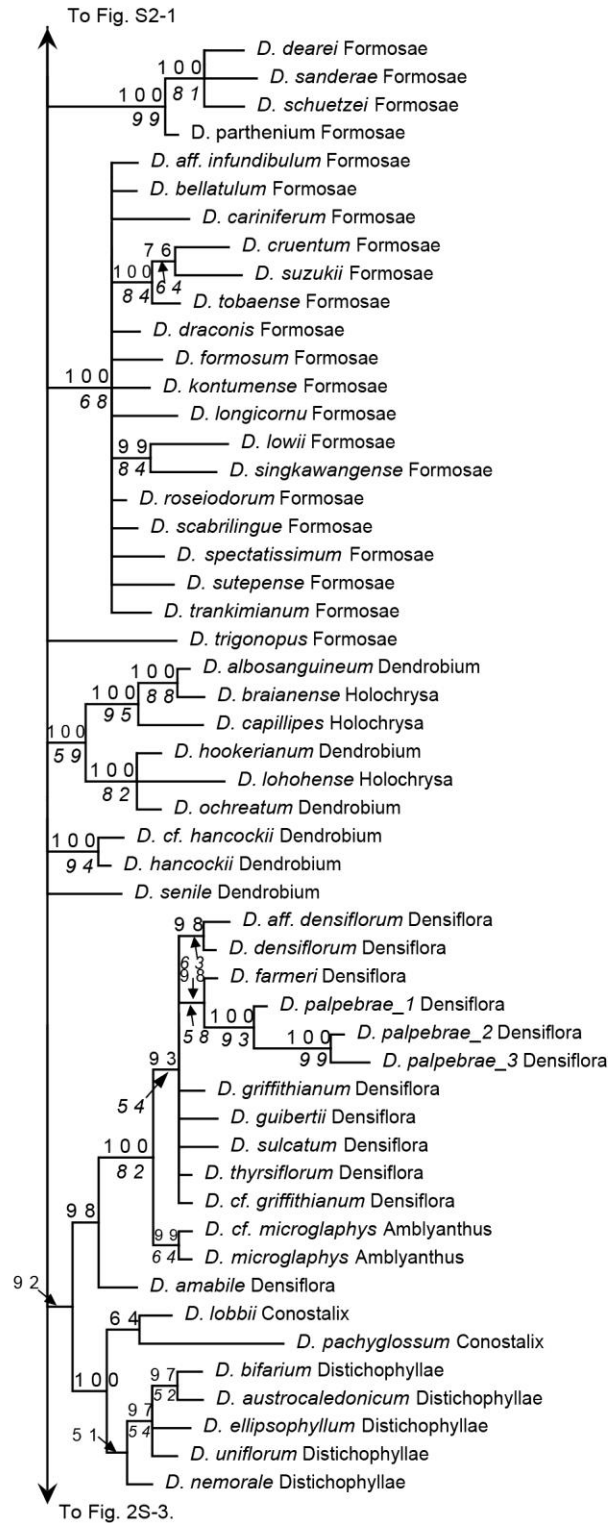

FIG. S2-3.

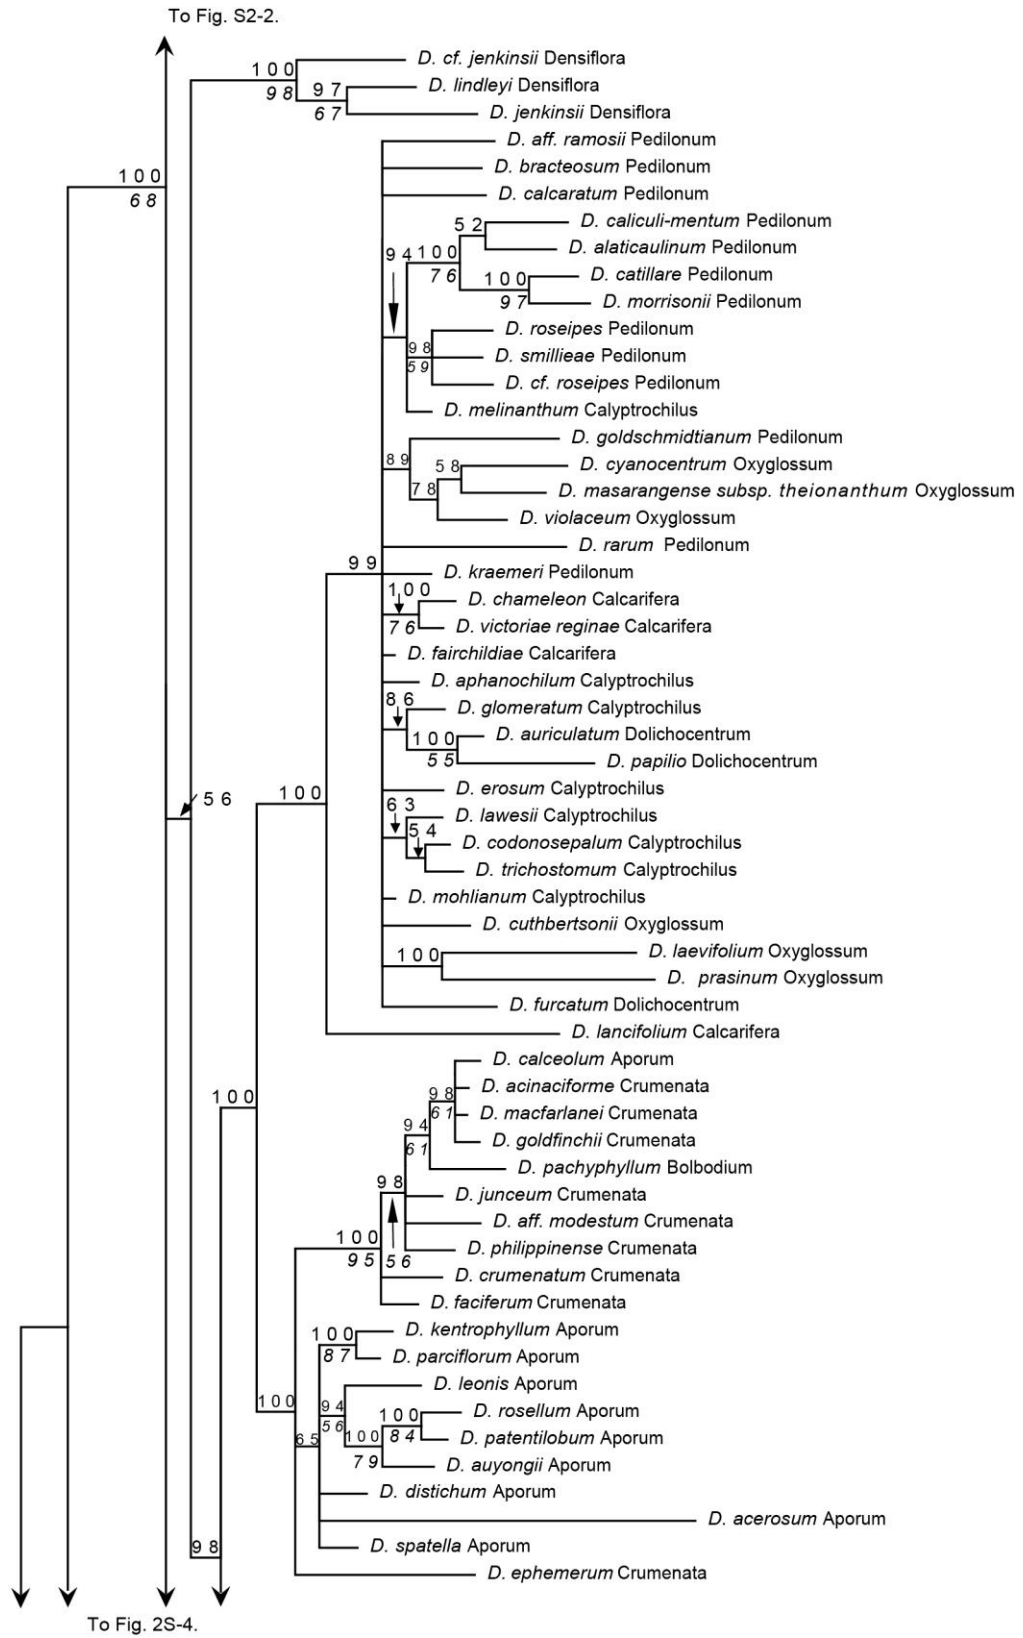

FIG. S2-4.

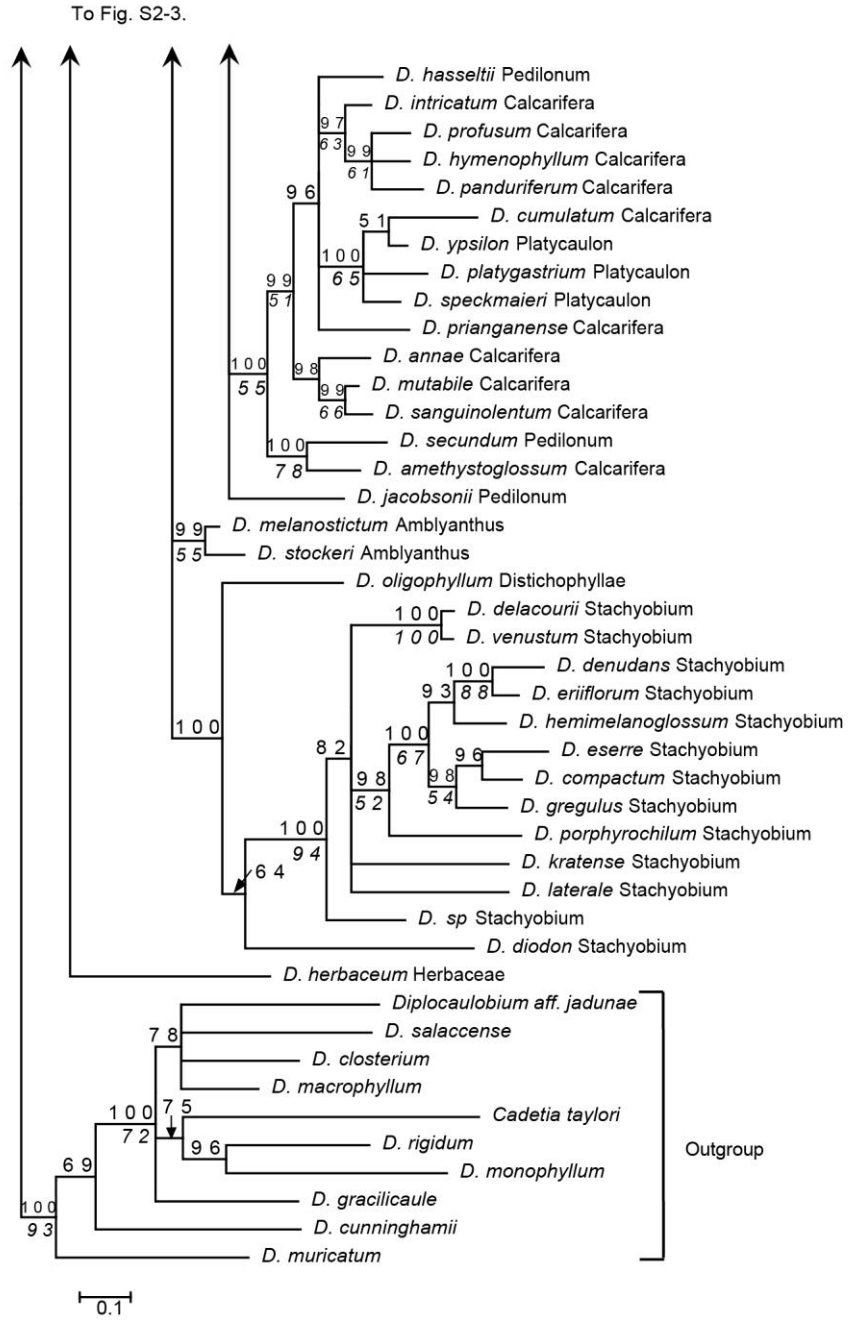

Supplement: supp_plu045_plu045supp.pdf [file supp_plu045_plu045supp.pdf]
